# Supplementary material
Source: PubMed Central journal article supplement (PMC9441726)
Supplement: sj-pdf-1-jcb-10.1177_0271678X221098503.pdf [file sj-pdf-1-jcb-10.1177_0271678X221098503.pdf]

**Supplementary Table S1.** Descriptions of significantly different brain regions in dynamic Reho between PD and HC groups

| Brain regions (AAL)            | Peak MNI coordinates (mm) |     |     | Peak T value | Cluster size (mm <sup>3</sup> ) |
|--------------------------------|---------------------------|-----|-----|--------------|---------------------------------|
|                                | X                         | Y   | Z   |              |                                 |
| <b>PD &gt; HC</b>              |                           |     |     |              |                                 |
| Right middle temporal gyrus    | 24                        | 15  | -36 | 7.11         | 77                              |
| Left rectus gyrus              | -12                       | 18  | -27 | 6.39         | 354                             |
| Left middle temporal gyrus     | -60                       | 9   | -18 | 7.52         | 99                              |
| Left middle occipital gyrus    | -39                       | -69 | 24  | 5.58         | 79                              |
| Left precuneus                 | 0                         | -57 | 36  | 5.36         | 156                             |
| <b>PD &lt; HC</b>              |                           |     |     |              |                                 |
| Left putamen                   | -21                       | 15  | 3   | -5.34        | 191                             |
| Right putamen                  | 27                        | 9   | 3   | -5.43        | 132                             |
| Right supplementary motor area | 6                         | -3  | 60  | -5.32        | 59                              |

These clusters are referred to multiple comparisons correction using the FWE rate (a cluster-defining threshold of  $P=0.001$  and a corrected cluster significance of  $P<0.05$ ).

Abbreviations: Reho, regional homogeneity; AAL, automated anatomical labeling; MNI, Montreal Neurological Institute; PD, Parkinson's disease; HC, healthy control

**Supplementary Table S2.** Descriptions of statistically different brain regions in static Reho between PD and HC groups

| Brain regions (AAL)           | Peak MNI coordinates (mm) |     |     | Peak T value | Cluster size (mm <sup>3</sup> ) |
|-------------------------------|---------------------------|-----|-----|--------------|---------------------------------|
|                               | X                         | Y   | Z   |              |                                 |
| <b>PD &gt; HC</b>             |                           |     |     |              |                                 |
| Right inferior temporal gyrus | -15                       | 21  | -27 | 6.66         | 1267                            |
| Left superior frontal gyrus   | 6                         | 42  | -3  | 4.15         | 96                              |
| <b>PD &lt; HC</b>             |                           |     |     |              |                                 |
| Bilateral lingual gyrus       | -12                       | -63 | -9  | -6.34        | 1384                            |
| Right postcentral gyrus       | 66                        | -6  | 18  | -4.93        | 186                             |
| Left postcentral gyrus        | -45                       | -18 | 39  | -5.36        | 236                             |

These clusters are referred to multiple comparisons correction using the FWE rate (a cluster-defining threshold of  $P = 0.001$  and a corrected cluster significance of  $P < 0.05$ ).

Abbreviations: Reho, regional homogeneity; AAL, automated anatomical labeling; MNI, Montreal Neurological Institute; PD, Parkinson's disease; HC, healthy control

**Supplementary Table S3.** Automated anatomical labeling information for region-based neurovascular coupling analysis

| Labels | Regions                                    |
|--------|--------------------------------------------|
| 17     | Left rolandic operculum                    |
| 18     | Right rolandic operculum                   |
| 20     | Right supplementary motor area             |
| 43     | Left calcarine fissure                     |
| 44     | Right calcarine fissure                    |
| 47     | Left lingual gyrus                         |
| 48     | Right lingual gyrus                        |
| 51     | Left middle occipital gyrus                |
| 53     | Left inferior occipital gyrus              |
| 57     | Left postcentral gyrus                     |
| 71     | Left caudate nucleus                       |
| 72     | Right caudate nucleus                      |
| 73     | Left putamen                               |
| 74     | Right putamen                              |
| 77     | Left thalamus                              |
| 79     | Left heschl gyrus                          |
| 80     | Right heschl gyrus                         |
| 81     | Left superior temporal gyrus               |
| 82     | Right superior temporal gyrus              |
| 85     | Left middle temporal gyrus                 |
| 88     | Right temporal pole: middle temporal gyrus |

**Supplementary Table S4.** Descriptions of statistically different brain regions in CBF/dReho ratio between PD and HC groups

| Brain regions (AAL)            | Peak MNI coordinates (mm) |     |     | Peak T value | Cluster size (mm <sup>3</sup> ) |
|--------------------------------|---------------------------|-----|-----|--------------|---------------------------------|
|                                | X                         | Y   | Z   |              |                                 |
| <b>PD &gt; HC</b>              |                           |     |     |              |                                 |
| Right putamen                  | 36                        | -9  | 12  | 6.47         | 650                             |
| Left putamen                   | -24                       | 18  | 3   | 6.44         | 637                             |
| Left postcentral gyrus         | -57                       | -15 | 21  | 4.88         | 196                             |
| Right supplementary motor area | 9                         | -3  | 57  | 5.57         | 105                             |
| Left paracentral lobule        | -3                        | -27 | 69  | 4.41         | 82                              |
| Right postcentral gyrus        | 66                        | -6  | 18  | 4.78         | 52                              |
| <b>PD &lt; HC</b>              |                           |     |     |              |                                 |
| Bilateral precuneus            | 0                         | -66 | 33  | -6.09        | 419                             |
| Left middle temporal gyrus     | -66                       | -24 | -9  | -5.43        | 169                             |
| Left superior temporal gyrus   | -21                       | 9   | -27 | -5.44        | 141                             |
| Left angular gyrus             | -39                       | -66 | 27  | -5.49        | 133                             |
| Right angular gyrus            | 45                        | -66 | 30  | -5.31        | 93                              |

These clusters are referred to multiple comparisons correction using the FWE rate (a cluster-defining threshold of  $P = 0.001$  and a corrected cluster significance of  $P < 0.05$ ).

Abbreviations: CBF, cerebral blood flow; dReho, dynamic regional homogeneity; AAL, automated anatomical labeling; MNI, Montreal Neurological Institute; PD, Parkinson's disease; HC, healthy control

**Supplementary Table S5.** Descriptions of statistically different brain regions in CBF/sReho ratio between PD and HC groups

| Brain regions (AAL)            | Peak MNI coordinates (mm) |     |     | Peak T value | Cluster size (mm <sup>3</sup> ) |
|--------------------------------|---------------------------|-----|-----|--------------|---------------------------------|
|                                | X                         | Y   | Z   |              |                                 |
| <b>PD &gt; HC</b>              |                           |     |     |              |                                 |
| Left lingual gyrus             | -21                       | -51 | -9  | 5.56         | 251                             |
| Right lingual gyrus            | 15                        | -54 | -6  | 5.37         | 441                             |
| Right putamen                  | 18                        | -18 | 12  | 5.87         | 420                             |
| Left putamen                   | -24                       | 24  | -9  | 5.43         | 393                             |
| Left postcentral gyrus         | -45                       | -18 | 39  | 6.69         | 726                             |
| Right postcentral gyrus        | 45                        | -18 | 36  | 5.95         | 357                             |
| Right supplementary motor area | -6                        | -27 | 66  | 5.02         | 259                             |
| <b>PD &lt; HC</b>              |                           |     |     |              |                                 |
| Left superior temporal gyrus   | -21                       | 3   | -24 | -5.87        | 610                             |
| Left middle temporal gyrus     | -66                       | -39 | -15 | -5.40        | 194                             |
| Right middle temporal gyrus    | 63                        | -42 | -9  | -5.54        | 111                             |
| Left angular gyrus             | -39                       | -69 | 30  | -4.54        | 68                              |

These clusters are referred to multiple comparisons correction using the FWE rate (a cluster-defining threshold of  $P = 0.001$  and a corrected cluster significance of  $P < 0.05$ ).

Abbreviations: CBF, cerebral blood flow; sReho, static regional homogeneity; AAL, automated anatomical labeling; MNI, Montreal Neurological Institute; PD, Parkinson's disease; HC, healthy control

**Supplementary Table S6.** Descriptions of statistically different brain regions in CBF between PD and HC groups

| Brain regions                                           | Peak MNI coordinates (mm) |     |     | Peak T value | Cluster size (mm <sup>3</sup> ) |
|---------------------------------------------------------|---------------------------|-----|-----|--------------|---------------------------------|
|                                                         | X                         | Y   | Z   |              |                                 |
| <b>PD &gt; HC</b>                                       |                           |     |     |              |                                 |
| Right putamen                                           | 33                        | -3  | 6   | 4.94         | 320                             |
| Left postcentral gyrus                                  | -57                       | -15 | 21  | 5.86         | 509                             |
| Right thalamus                                          | 15                        | -18 | 9   | 7.12         | 91                              |
| Left paracentral lobule/ Right supplementary motor area | -3                        | -27 | 66  | 5.45         | 223                             |
| <b>PD &lt; HC</b>                                       |                           |     |     |              |                                 |
| Right insula                                            | 48                        | 12  | -6  | -5.25        | 151                             |
| Left superior frontal gyrus                             | 0                         | 60  | -6  | -5.16        | 201                             |
| Left superior temporal gyrus                            | -39                       | 21  | -21 | -5.20        | 114                             |

These clusters are referred to multiple comparisons correction using the FWE rate (a cluster-defining threshold of  $P = 0.001$  and a corrected cluster significance of  $P < 0.05$ ).

Abbreviations: CBF, cerebral blood flow; AAL, automated anatomical labeling; MNI, Montreal Neurological Institute; PD, Parkinson's disease; HC, healthy control

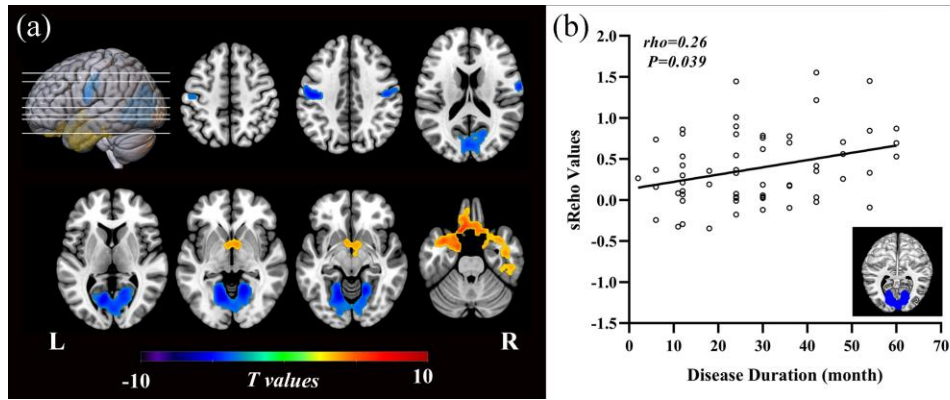

**Supplementary Figure S1:** The distribution of brain regions with significant intergroup differences in static ReHo and correlations to clinical assessments. Voxel-based analysis demonstrates the survived clusters between PD and HC groups (a). These clusters are referred to multiple comparisons correction using the FWE rate (a cluster-defining threshold of  $P = 0.001$  and a corrected cluster significance of  $P < 0.05$ ). Significantly increased value in the group is shown with warm color, while significantly decreased value in the group is shown with cold color. For PD group: correlations (b) between the disease duration (X-axis) and dReHo values in right putamen (Y-axis).

Abbreviations: sReHo, static regional homogeneity; PD, Parkinson disease; HC, healthy control; FWE, familywise error; R, right; L, left

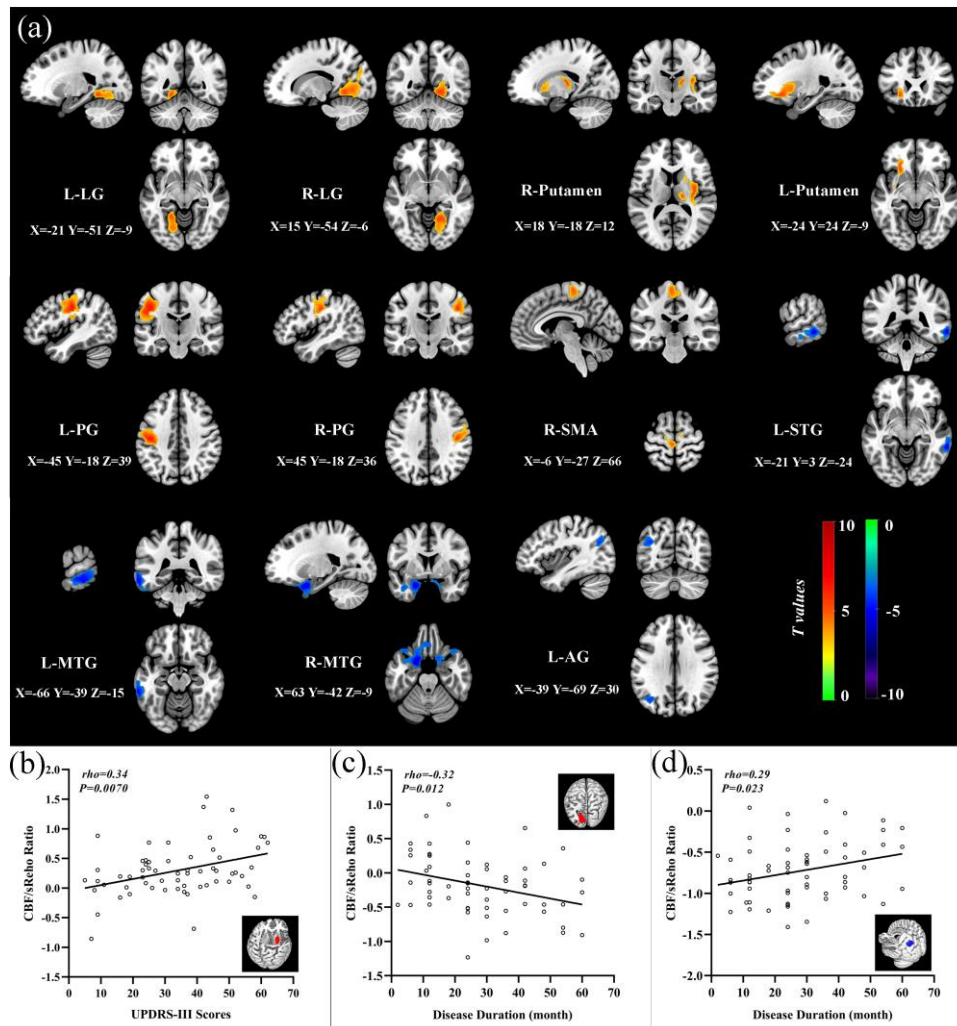

**Supplementary Figure S2:** The distribution of brain regions with significant intergroup differences in CBF/sReHo ratio and correlations to clinical assessments. Voxel-based analysis demonstrates the survived clusters between PD and HC groups (a). These clusters are referred to multiple comparisons correction using the FWE rate (a cluster-defining threshold of  $P = 0.001$  and a corrected cluster significance of  $P < 0.05$ ). Significantly increased value in the group is shown with warm color, while significantly decreased value in the group is shown with cold color. For PD group: correlations (b) between the scores of UPDRS-III (X-axis) and CBF/sReHo ratio in right putamen (Y-axis); correlations (c) between the disease duration (X-axis) and CBF/sReHo ratio in left LG (Y-axis); correlations (d) between the disease duration (X-axis) and CBF/sReHo ratio in left AG (Y-axis).

Abbreviations: sReHo, static regional homogeneity; PD, Parkinson disease; HC, healthy control; FWE, familywise error; R, right; L, left; LG, lingual gyrus; PG, postcentral gyrus; SMA, supplementary motor area; STG, superior temporal gyrus; MTG, middle temporal gyrus; AG, angular gyrus



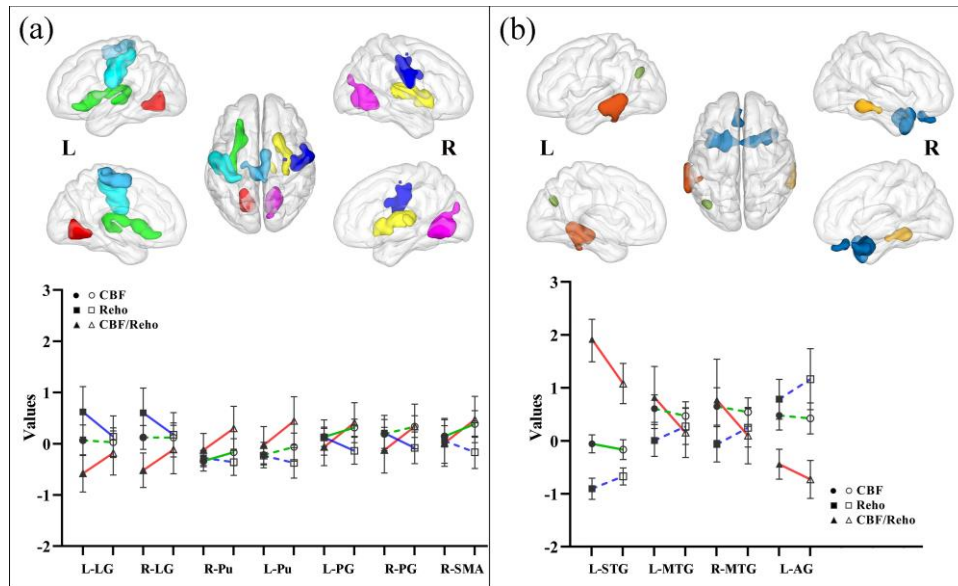

**Supplementary Figure S3.** The trend of brain regions with significant intergroup differences in CBF/sReHo ratio. In the voxel-based analyses of PD and HC groups, the CBF/sReHo ratio in regions of significant increased (a) and in regions of significant increased (b). The solid symbol refers to HC group, whereas blank symbol refers to PD group. Solid line indicates significant intergroup differences, whereas dotted line indicates non-significant differences.

Abbreviations: sReHo, static regional homogeneity; CBF, cerebral blood flow; PD, Parkinson disease; HC, healthy control; R, right; L, left; LG, lingual gyrus; Pu, putamen; PG, postcentral gyrus; SMA, supplementary motor area; STG, superior temporal gyrus; MTG, middle temporal gyrus; AG, angular gyrus

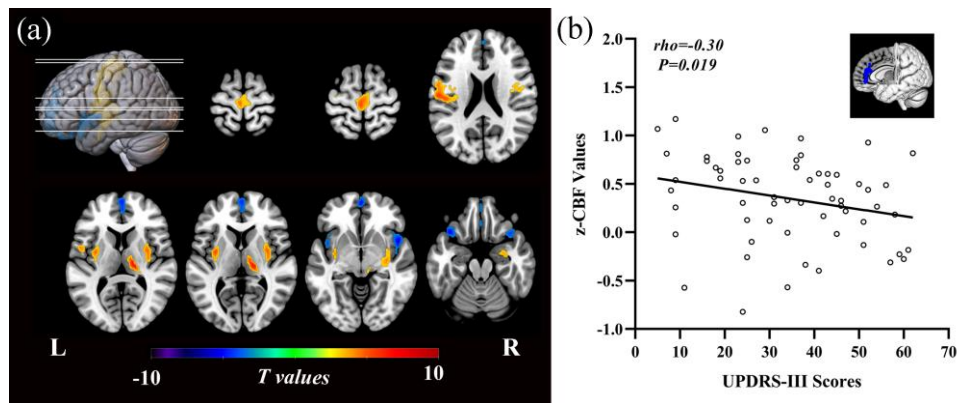

**Supplementary Figure S4:** The distribution of brain regions with significant intergroup differences in CBF and correlations to clinical assessments. Voxel-based analysis demonstrates the survived clusters between PD and HC groups (a). These clusters are referred to multiple comparisons correction using the FWE rate (a cluster-defining threshold of  $P = 0.001$  and a corrected cluster significance of  $P < 0.05$ ). Significantly increased in the group is shown with warm color, while significantly decreased in the group is shown with cold color. For PD group: correlations (b) between the scores of UPDRS-III (X-axis) and z-CBF values in left superior frontal gyrus (Y-axis).

Abbreviations: sReHo, static regional homogeneity; PD, Parkinson disease; HC, healthy control; FWE, familywise error; R, right; L, left
